# Supplementary material for: Testing the implementation and sustainment facilitation (ISF) strategy as an effective adjunct to the Addiction Technology Transfer Center (ATTC) strategy: study protocol for a cluster randomized trial
Source: Springer Nature journal article supplement (doi:10.1186/s13722-017-0096-7), 2017-11-17
Supplement: MOESM3 [file 15233860]

**Table 5. Dose for Each Overarching Strategy During the Implementation Phase (Months 7 – 12)**

| Blended Strategy and the discrete strategies that it encompasses | Month 1                                            |                        |                | Month 2                                   |                        |                | Month 3                                   |                        |                | Month 4                                   |                        |                | Month 5                                   |                        |                | Month 6                                   |                        |                |           |  |
|------------------------------------------------------------------|----------------------------------------------------|------------------------|----------------|-------------------------------------------|------------------------|----------------|-------------------------------------------|------------------------|----------------|-------------------------------------------|------------------------|----------------|-------------------------------------------|------------------------|----------------|-------------------------------------------|------------------------|----------------|-----------|--|
|                                                                  | Training, Coaching, or Facilitation Staff          | ASO's Leadership Staff | ASO's BI Staff | Training, Coaching, or Facilitation Staff | ASO's Leadership Staff | ASO's BI Staff | Training, Coaching, or Facilitation Staff | ASO's Leadership Staff | ASO's BI Staff | Training, Coaching, or Facilitation Staff | ASO's Leadership Staff | ASO's BI Staff | Training, Coaching, or Facilitation Staff | ASO's Leadership Staff | ASO's BI Staff | Training, Coaching, or Facilitation Staff | ASO's Leadership Staff | ASO's BI Staff |           |  |
| ADDITION TECHNOLOGY TRANSFER CENTER (ATTC)                       | A. Centralized technical assistance                | As Needed              | NA             | NA                                        | As Needed              | NA             | NA                                        | As Needed              | NA             | 5 Hours                                   | 16 Hours               | NA             | 16 Hours                                  | As Needed              | NA             | 2-4 Hours                                 | As Needed              | NA             | 2-4 Hours |  |
|                                                                  | B. Develop educational materials                   |                        |                |                                           |                        |                |                                           |                        |                |                                           |                        |                |                                           |                        |                |                                           |                        |                |           |  |
|                                                                  | C. Develop and organize quality monitoring systems |                        |                |                                           |                        |                |                                           |                        |                |                                           |                        |                |                                           |                        |                |                                           |                        |                |           |  |
|                                                                  | D. Develop tools for quality monitoring            |                        |                |                                           |                        |                |                                           |                        |                |                                           |                        |                |                                           |                        |                |                                           |                        |                |           |  |
|                                                                  | E. Distribute educational materials                |                        |                |                                           |                        |                |                                           |                        |                |                                           |                        |                |                                           |                        |                |                                           |                        |                |           |  |
|                                                                  | F. Conduct educational meetings                    |                        |                |                                           |                        |                |                                           |                        |                |                                           |                        |                |                                           |                        |                |                                           |                        |                |           |  |
|                                                                  | G. Make training dynamic                           |                        |                |                                           |                        |                |                                           |                        |                |                                           |                        |                |                                           |                        |                |                                           |                        |                |           |  |
|                                                                  | H. Audit & Provide feedback                        | +                      |                | +                                         | +                      |                | +                                         | +                      |                | +                                         | +                      |                | +                                         | +                      |                | +                                         | +                      |                | +         |  |
|                                                                  | I. Provide ongoing consultation                    |                        |                |                                           |                        |                |                                           |                        |                |                                           |                        |                |                                           |                        |                |                                           |                        |                |           |  |
|                                                                  | J. Create a learning collaborative                 | +                      |                | +                                         | +                      |                | +                                         | +                      |                | +                                         | +                      |                | +                                         | +                      |                | +                                         | +                      |                | +         |  |
| IMPLEMENTATION & SUSTAINMENT FACILITATION (ISF)                  | K. Use an improvement and implementation advisor   | 1 Hour                 | 1 Hour         | 1 Hour                                    | 1 Hour                 | 1 Hour         | 1 Hour                                    | 1 Hour                 | 1 Hour         | 1 Hour                                    | 1 Hour                 | 1 Hour         | 1 Hour                                    | 1 Hour                 | 1 Hour         | 1 Hour                                    | 1 Hour                 | 1 Hour         | 1 Hour    |  |
|                                                                  | L. Develop tools for quality improvement           |                        |                |                                           |                        |                |                                           |                        |                |                                           |                        |                |                                           |                        |                |                                           |                        |                |           |  |
|                                                                  | M. Organize implementation team meetings           | +                      | +              | +                                         | +                      | +              | +                                         | +                      | +              | +                                         | +                      | +              | +                                         | +                      | +              | +                                         | +                      | +              | +         |  |
|                                                                  | N. Identify and prepare champions                  | +                      | +              | +                                         | +                      | +              | +                                         | +                      | +              | +                                         | +                      | +              | +                                         | +                      | +              | +                                         | +                      | +              | +         |  |
|                                                                  | O. Assess for readiness and identify barriers      | +                      | +              | +                                         | +                      | +              | +                                         | +                      | +              | +                                         | +                      | +              | +                                         | +                      | +              | +                                         | +                      | +              | +         |  |
|                                                                  | P. Conduct local consensus discussions             |                        |                |                                           | +                      | +              | +                                         |                        |                |                                           |                        |                |                                           |                        |                |                                           |                        |                |           |  |
|                                                                  | Q. Conduct cyclical small tests of change          |                        |                |                                           | +                      | +              | +                                         | +                      | +              | +                                         | +                      | +              | +                                         | +                      | +              | +                                         | +                      | +              | +         |  |

**Note:** During the 6-month implementation phase, the ATTC strategy’s overarching discrete strategy (centralized technical assistance) encompasses 2 discrete strategies. During the 6-month implementation phase, the ISF strategy’s overarching discrete strategy (use an improvement and implementation advisor) encompasses 5 discrete strategies. For each month, intensity (i.e., time) is reported for the overarching strategy, with “+” being used to indicate the discrete strategies encompassed for that month. NA = not applicable; ASO = AIDS service organization; BI = brief intervention.
