# Supplementary material for: Testing the implementation and sustainment facilitation (ISF) strategy as an effective adjunct to the Addiction Technology Transfer Center (ATTC) strategy: study protocol for a cluster randomized trial
Source: Addict Sci Clin Pract. 2017 Nov 17;12:32. doi: 10.1186/s13722-017-0096-7 (PMC5693537; doi:10.1186/s13722-017-0096-7)
Supplement: Supplementary file 4 — Additional file 4. Table 6. [file 13722_2017_96_MOESM4_ESM.pdf]

**Table 6. Dose for Each Overarching Strategy During the Sustainment Phase (Months 13 – 18)**

| Blended Strategy and the discrete strategies that it encompasses | Month 1                                            |                        |                | Month 2                                   |                        |                | Month 3                                   |                        |                | Month 4                                   |                        |                | Month 5                                   |                        |                | Month 6                                   |                        |                |
|------------------------------------------------------------------|----------------------------------------------------|------------------------|----------------|-------------------------------------------|------------------------|----------------|-------------------------------------------|------------------------|----------------|-------------------------------------------|------------------------|----------------|-------------------------------------------|------------------------|----------------|-------------------------------------------|------------------------|----------------|
|                                                                  | Training, Coaching, or Facilitation Staff          | ASO's Leadership Staff | ASO's BI Staff | Training, Coaching, or Facilitation Staff | ASO's Leadership Staff | ASO's BI Staff | Training, Coaching, or Facilitation Staff | ASO's Leadership Staff | ASO's BI Staff | Training, Coaching, or Facilitation Staff | ASO's Leadership Staff | ASO's BI Staff | Training, Coaching, or Facilitation Staff | ASO's Leadership Staff | ASO's BI Staff | Training, Coaching, or Facilitation Staff | ASO's Leadership Staff | ASO's BI Staff |
| ADDITION TECHNOLOGY TRANSFER CENTER (ATTC)                       | A. Centralized technical assistance                | NA                     | NA             | NA                                        | NA                     | NA             |
|                                                                  | B. Develop educational materials                   |                        |                |                                           |                        |                |                                           |                        |                |                                           |                        |                |                                           |                        |                |                                           |                        |                |
|                                                                  | C. Develop and organize quality monitoring systems |                        |                |                                           |                        |                |                                           |                        |                |                                           |                        |                |                                           |                        |                |                                           |                        |                |
|                                                                  | D. Develop tools for quality monitoring            |                        |                |                                           |                        |                |                                           |                        |                |                                           |                        |                |                                           |                        |                |                                           |                        |                |
|                                                                  | E. Distribute educational materials                |                        |                |                                           |                        |                |                                           |                        |                |                                           |                        |                |                                           |                        |                |                                           |                        |                |
|                                                                  | F. Conduct educational meetings                    |                        |                |                                           |                        |                |                                           |                        |                |                                           |                        |                |                                           |                        |                |                                           |                        |                |
|                                                                  | G. Make training dynamic                           |                        |                |                                           |                        |                |                                           |                        |                |                                           |                        |                |                                           |                        |                |                                           |                        |                |
|                                                                  | H. Audit & Provide feedback                        |                        |                |                                           |                        |                |                                           |                        |                |                                           |                        |                |                                           |                        |                |                                           |                        |                |
|                                                                  | I. Provide ongoing consultation                    |                        |                |                                           |                        |                |                                           |                        |                |                                           |                        |                |                                           |                        |                |                                           |                        |                |
|                                                                  | J. Create a learning collaborative                 |                        |                |                                           |                        |                |                                           |                        |                |                                           |                        |                |                                           |                        |                |                                           |                        |                |
| IMPLEMENTATION & SUSTAINMENT FACILITATION (ISF)                  | K. Use an improvement and implementation advisor   | 1 Hour                 | 1 Hour         | 1 Hour                                    | 1 Hour                 | 1 Hour         | 1 Hour                                    | 1 Hour                 | 1 Hour         | 1 Hour                                    | 1 Hour                 | 1 Hour         | 1 Hour                                    | 1 Hour                 | 1 Hour         | 1 Hour                                    | 1 Hour                 | 1 Hour         |
|                                                                  | L. Develop tools for quality improvement           | +                      | +              | +                                         | +                      | +              | +                                         | +                      | +              | +                                         | +                      | +              | +                                         | +                      | +              | +                                         | +                      | +              |
|                                                                  | M. Organize implementation team meetings           | +                      | +              | +                                         | +                      | +              | +                                         | +                      | +              | +                                         | +                      | +              | +                                         | +                      | +              | +                                         | +                      | +              |
|                                                                  | N. Identify and prepare champions                  | +                      | +              | +                                         | +                      | +              | +                                         | +                      | +              | +                                         | +                      | +              | +                                         | +                      | +              | +                                         | +                      | +              |
|                                                                  | O. Assess for readiness and identify barriers      | +                      | +              | +                                         | +                      | +              | +                                         | +                      | +              | +                                         | +                      | +              | +                                         | +                      | +              | +                                         | +                      | +              |
|                                                                  | P. Conduct local consensus discussions             | +                      | +              | +                                         | +                      | +              | +                                         | +                      | +              | +                                         | +                      | +              | +                                         | +                      | +              | +                                         | +                      | +              |
|                                                                  | Q. Conduct cyclical small tests of change          | +                      | +              | +                                         | +                      | +              | +                                         | +                      | +              | +                                         | +                      | +              | +                                         | +                      | +              | +                                         | +                      | +              |

**Note:** The ATTC strategy's is no longer provided during the 6-month sustainment phase. The ISF strategy is optional during the 6-month sustainment phase. Consistent with an organization-centered approach, any of the discrete strategies are options to use. However, if used the intensity (i.e., time) of the ISF strategy is limited to 1 hour per month. NA = not applicable; ASO = AIDS service organization; BI = brief intervention.
